# Supplementary material
Source: publisher figshare collection journal article supplement (https://acs.figshare.com/ndownloader/files/5103247)
Supplement: Supplementary file 1 [file 5103247]

  
data_y1877 
  
_audit_creation_method            SHELXL-97 
_chemical_name_systematic 
; 
 ? 
; 
_chemical_name_common             ? 
_chemical_melting_point           ? 
_chemical_formula_moiety          ? 
_chemical_formula_sum 
 'C24 H22 O6' 
_chemical_formula_weight          406.42 
  
loop_ 
 _atom_type_symbol 
 _atom_type_description 
 _atom_type_scat_dispersion_real 
 _atom_type_scat_dispersion_imag 
 _atom_type_scat_source 
 'C'  'C'   0.0033   0.0016 
 'International Tables Vol C Tables 4.2.6.8 and 6.1.1.4' 
 'H'  'H'   0.0000   0.0000 
 'International Tables Vol C Tables 4.2.6.8 and 6.1.1.4' 
 'O'  'O'   0.0106   0.0060 
 'International Tables Vol C Tables 4.2.6.8 and 6.1.1.4' 
  
_symmetry_cell_setting            Monoclinic 
_symmetry_space_group_name_H-M    P2(1)/c 
  
loop_ 
 _symmetry_equiv_pos_as_xyz 
 'x, y, z' 
 '-x, y+1/2, -z+1/2' 
 '-x, -y, -z' 
 'x, -y-1/2, z-1/2' 
  
_cell_length_a                    7.468(2) 
_cell_length_b                    19.811(5) 
_cell_length_c                    14.249(4) 
_cell_angle_alpha                 90.00 
_cell_angle_beta                  96.801(4) 
_cell_angle_gamma                 90.00 
_cell_volume                      2093.2(10) 
_cell_formula_units_Z             4 
_cell_measurement_temperature     291(2) 
_cell_measurement_reflns_used     33 
_cell_measurement_theta_min       2.46 
_cell_measurement_theta_max       14.8 
  
_exptl_crystal_description        ? 
_exptl_crystal_colour             ? 
_exptl_crystal_size_max           0.56 
_exptl_crystal_size_mid           0.45 
_exptl_crystal_size_min           0.34 
_exptl_crystal_density_meas       ? 
_exptl_crystal_density_diffrn     1.290 
_exptl_crystal_density_method     'not measured' 
_exptl_crystal_F_000              856 
_exptl_absorpt_coefficient_mu     0.093 
_exptl_absorpt_correction_type    none 
_exptl_absorpt_correction_T_min   ? 
_exptl_absorpt_correction_T_max   ? 
_exptl_absorpt_process_details    ? 
  
_exptl_special_details 
; 
 ? 
; 
  
_diffrn_ambient_temperature       291(2) 
_diffrn_radiation_wavelength      0.71073 
_diffrn_radiation_type            MoK\a 
_diffrn_radiation_source          'normal-focus sealed tube' 
_diffrn_radiation_monochromator   graphite 
_diffrn_measurement_device_type   'Siemens P4' 
_diffrn_measurement_method        '\w scans' 
_diffrn_detector_area_resol_mean  ? 
_diffrn_standards_number          ? 
_diffrn_standards_interval_count  ? 
_diffrn_standards_interval_time   ? 
_diffrn_standards_decay_%         2.92 
_diffrn_reflns_number             10796 
_diffrn_reflns_av_R_equivalents   0.0168 
_diffrn_reflns_av_sigmaI/netI     0.0191 
_diffrn_reflns_limit_h_min        -9 
_diffrn_reflns_limit_h_max        7 
_diffrn_reflns_limit_k_min        -23 
_diffrn_reflns_limit_k_max        23 
_diffrn_reflns_limit_l_min        -17 
_diffrn_reflns_limit_l_max        17 
_diffrn_reflns_theta_min          1.77 
_diffrn_reflns_theta_max          25.50 
_reflns_number_total              3872 
_reflns_number_gt                 3208 
_reflns_threshold_expression      >2sigma(I) 
  
_computing_data_collection        'Siemens XSCANS' 
_computing_cell_refinement        'Siemens XSCANS' 
_computing_data_reduction         'Siemens SHELXTL' 
_computing_structure_solution     'SHELXS-97 (Sheldrick, 1990)' 
_computing_structure_refinement   'SHELXL-97 (Sheldrick, 1997)' 
_computing_molecular_graphics     'Siemens SHELXTL' 
_computing_publication_material   'Siemens SHELXTL' 
  
_refine_special_details 
; 
 Refinement of F^2^ against ALL reflections.  The weighted R-factor wR and 
 goodness of fit S are based on F^2^, conventional R-factors R are based 
 on F, with F set to zero for negative F^2^. The threshold expression of 
 F^2^ > 2sigma(F^2^) is used only for calculating R-factors(gt) etc. and is 
 not relevant to the choice of reflections for refinement.  R-factors based 
 on F^2^ are statistically about twice as large as those based on F, and R- 
 factors based on ALL data will be even larger. 
; 
  
_refine_ls_structure_factor_coef  Fsqd 
_refine_ls_matrix_type            full 
_refine_ls_weighting_scheme       calc 
_refine_ls_weighting_details 
 'calc w=1/[\s^2^(Fo^2^)+(0.0538P)^2^+0.2906P] where P=(Fo^2^+2Fc^2^)/3' 
_atom_sites_solution_primary      direct 
_atom_sites_solution_secondary    difmap 
_atom_sites_solution_hydrogens    geom 
_refine_ls_hydrogen_treatment     constr 
_refine_ls_extinction_method      SHELXL 
_refine_ls_extinction_coef        0.0088(13) 
_refine_ls_extinction_expression 
 'Fc^*^=kFc[1+0.001xFc^2^\l^3^/sin(2\q)]^-1/4^' 
_refine_ls_number_reflns          3872 
_refine_ls_number_parameters      275 
_refine_ls_number_restraints      0 
_refine_ls_R_factor_all           0.0448 
_refine_ls_R_factor_gt            0.0370 
_refine_ls_wR_factor_ref          0.1064 
_refine_ls_wR_factor_gt           0.1028 
_refine_ls_goodness_of_fit_ref    1.102 
_refine_ls_restrained_S_all       1.102 
_refine_ls_shift/su_max           0.000 
_refine_ls_shift/su_mean          0.000 
  
loop_ 
 _atom_site_label 
 _atom_site_type_symbol 
 _atom_site_fract_x 
 _atom_site_fract_y 
 _atom_site_fract_z 
 _atom_site_U_iso_or_equiv 
 _atom_site_adp_type 
 _atom_site_occupancy 
 _atom_site_symmetry_multiplicity 
 _atom_site_calc_flag 
 _atom_site_refinement_flags 
 _atom_site_disorder_assembly 
 _atom_site_disorder_group 
O1 O 0.26594(13) 0.63215(5) 0.28220(6) 0.0469(3) Uani 1 1 d . . . 
O2 O 0.66698(14) 0.71739(6) 0.23773(7) 0.0585(3) Uani 1 1 d . . . 
O3 O 0.60189(18) 0.60667(6) 0.23674(9) 0.0739(4) Uani 1 1 d . . . 
O4 O 0.47357(13) 0.80244(5) 0.53294(6) 0.0493(3) Uani 1 1 d . . . 
O5 O 0.36188(16) 0.86822(5) 0.31235(7) 0.0556(3) Uani 1 1 d . . . 
O6 O 0.27745(19) 0.81871(6) 0.17318(7) 0.0726(4) Uani 1 1 d . . . 
C1 C 0.1604(3) 0.34410(9) 0.48330(17) 0.0876(6) Uani 1 1 d . . . 
H1A H 0.0353 0.3343 0.4646 0.105 Uiso 1 1 calc R . . 
H1B H 0.1865 0.3392 0.5506 0.105 Uiso 1 1 calc R . . 
H1C H 0.2337 0.3133 0.4524 0.105 Uiso 1 1 calc R . . 
C2 C 0.2007(2) 0.41581(8) 0.45540(14) 0.0641(4) Uani 1 1 d . . . 
C3 C 0.2302(3) 0.46609(9) 0.52240(13) 0.0692(5) Uani 1 1 d . . . 
H3 H 0.2290 0.4553 0.5858 0.083 Uiso 1 1 calc R . . 
C4 C 0.2612(2) 0.53190(8) 0.49753(11) 0.0625(4) Uani 1 1 d . . . 
H4 H 0.2790 0.5647 0.5444 0.075 Uiso 1 1 calc R . . 
C5 C 0.26651(19) 0.55010(7) 0.40348(10) 0.0466(3) Uani 1 1 d . . . 
C6 C 0.2382(3) 0.49964(8) 0.33629(12) 0.0666(5) Uani 1 1 d . . . 
H6 H 0.2410 0.5100 0.2728 0.080 Uiso 1 1 calc R . . 
C7 C 0.2057(3) 0.43392(9) 0.36248(15) 0.0782(5) Uani 1 1 d . . . 
H7 H 0.1866 0.4010 0.3159 0.094 Uiso 1 1 calc R . . 
C8 C 0.30172(18) 0.62002(7) 0.37745(9) 0.0422(3) Uani 1 1 d . . . 
C9 C 0.35330(19) 0.67144(7) 0.43666(9) 0.0433(3) Uani 1 1 d . . . 
H9 H 0.3911 0.6628 0.5001 0.052 Uiso 1 1 calc R . . 
C10 C 0.34993(17) 0.73984(6) 0.40185(9) 0.0386(3) Uani 1 1 d . . . 
C11 C 0.34858(17) 0.75005(6) 0.30795(8) 0.0396(3) Uani 1 1 d . . . 
C12 C 0.36438(19) 0.68759(6) 0.24953(9) 0.0426(3) Uani 1 1 d . . . 
H12 H 0.3096 0.6980 0.1852 0.051 Uiso 1 1 calc R . . 
C13 C 0.34139(18) 0.79396(6) 0.47553(8) 0.0387(3) Uani 1 1 d . . . 
C14 C 0.16976(17) 0.83141(6) 0.47993(8) 0.0386(3) Uani 1 1 d . . . 
C15 C 0.16640(19) 0.88555(6) 0.54210(9) 0.0423(3) Uani 1 1 d . . . 
H15 H 0.2710 0.8980 0.5802 0.051 Uiso 1 1 calc R . . 
C16 C 0.0084(2) 0.92072(7) 0.54742(10) 0.0483(3) Uani 1 1 d . . . 
H16 H 0.0084 0.9568 0.5893 0.058 Uiso 1 1 calc R . . 
C17 C -0.15102(19) 0.90356(7) 0.49163(11) 0.0492(3) Uani 1 1 d . . . 
C18 C -0.1471(2) 0.84898(8) 0.43061(11) 0.0551(4) Uani 1 1 d . . . 
H18 H -0.2521 0.8362 0.3932 0.066 Uiso 1 1 calc R . . 
C19 C 0.01058(19) 0.81337(7) 0.42469(10) 0.0502(4) Uani 1 1 d . . . 
H19 H 0.0102 0.7770 0.3834 0.060 Uiso 1 1 calc R . . 
C20 C -0.3224(2) 0.94251(8) 0.49884(15) 0.0680(5) Uani 1 1 d . . . 
H20A H -0.2990 0.9781 0.5443 0.082 Uiso 0.50 1 calc PR . . 
H20B H -0.4123 0.9127 0.5184 0.082 Uiso 0.50 1 calc PR . . 
H20C H -0.3651 0.9615 0.4383 0.082 Uiso 0.50 1 calc PR . . 
H20D H -0.4186 0.9234 0.4564 0.082 Uiso 0.50 1 calc PR . . 
H20E H -0.3053 0.9888 0.4823 0.082 Uiso 0.50 1 calc PR . . 
H20F H -0.3525 0.9400 0.5624 0.082 Uiso 0.50 1 calc PR . . 
C21 C 0.5580(2) 0.66452(7) 0.24223(9) 0.0495(4) Uani 1 1 d . . . 
C22 C 0.8454(2) 0.70205(12) 0.21331(15) 0.0820(6) Uani 1 1 d . . . 
H22A H 0.9032 0.6702 0.2578 0.098 Uiso 1 1 calc R . . 
H22B H 0.9157 0.7427 0.2151 0.098 Uiso 1 1 calc R . . 
H22C H 0.8357 0.6831 0.1509 0.098 Uiso 1 1 calc R . . 
C23 C 0.32497(19) 0.81456(7) 0.25678(9) 0.0444(3) Uani 1 1 d . . . 
C24 C 0.3257(3) 0.93348(8) 0.26898(13) 0.0793(6) Uani 1 1 d . . . 
H24A H 0.4011 0.9398 0.2196 0.095 Uiso 1 1 calc R . . 
H24B H 0.3506 0.9682 0.3157 0.095 Uiso 1 1 calc R . . 
H24C H 0.2013 0.9359 0.2428 0.095 Uiso 1 1 calc R . . 
  
loop_ 
 _atom_site_aniso_label 
 _atom_site_aniso_U_11 
 _atom_site_aniso_U_22 
 _atom_site_aniso_U_33 
 _atom_site_aniso_U_23 
 _atom_site_aniso_U_13 
 _atom_site_aniso_U_12 
O1 0.0567(6) 0.0462(5) 0.0369(5) -0.0033(4) 0.0020(4) -0.0030(4) 
O2 0.0503(6) 0.0677(7) 0.0586(6) -0.0139(5) 0.0112(5) 0.0013(5) 
O3 0.0861(9) 0.0576(7) 0.0829(8) 0.0037(6) 0.0303(7) 0.0244(6) 
O4 0.0496(6) 0.0550(6) 0.0418(5) -0.0065(4) -0.0005(4) 0.0009(4) 
O5 0.0833(8) 0.0416(5) 0.0416(5) 0.0019(4) 0.0062(5) -0.0028(5) 
O6 0.1185(11) 0.0569(7) 0.0386(6) 0.0049(5) -0.0068(6) 0.0106(6) 
C1 0.0906(15) 0.0530(10) 0.1157(17) 0.0142(11) -0.0018(12) -0.0144(9) 
C2 0.0588(10) 0.0493(9) 0.0826(12) 0.0100(8) 0.0017(8) -0.0045(7) 
C3 0.0881(13) 0.0567(10) 0.0621(10) 0.0116(8) 0.0057(9) -0.0113(9) 
C4 0.0848(12) 0.0509(9) 0.0518(8) 0.0017(7) 0.0074(8) -0.0089(8) 
C5 0.0463(8) 0.0436(7) 0.0497(8) -0.0015(6) 0.0056(6) -0.0001(6) 
C6 0.0942(13) 0.0504(9) 0.0551(9) -0.0054(7) 0.0093(9) -0.0066(8) 
C7 0.1057(15) 0.0473(9) 0.0806(13) -0.0125(9) 0.0063(11) -0.0125(9) 
C8 0.0430(7) 0.0458(7) 0.0378(7) 0.0011(6) 0.0049(5) 0.0034(6) 
C9 0.0525(8) 0.0428(7) 0.0341(6) 0.0004(5) 0.0038(6) 0.0026(6) 
C10 0.0380(7) 0.0418(7) 0.0360(6) -0.0005(5) 0.0043(5) 0.0027(5) 
C11 0.0417(7) 0.0430(7) 0.0341(6) -0.0010(5) 0.0049(5) 0.0031(5) 
C12 0.0519(8) 0.0439(7) 0.0319(6) -0.0007(5) 0.0045(5) 0.0032(6) 
C13 0.0470(7) 0.0383(7) 0.0312(6) 0.0020(5) 0.0067(5) -0.0042(5) 
C14 0.0462(7) 0.0367(7) 0.0337(6) 0.0016(5) 0.0079(5) -0.0019(5) 
C15 0.0535(8) 0.0346(6) 0.0384(7) 0.0024(5) 0.0037(6) -0.0017(6) 
C16 0.0624(9) 0.0333(7) 0.0507(8) -0.0011(6) 0.0126(7) 0.0031(6) 
C17 0.0499(8) 0.0406(7) 0.0591(9) 0.0071(6) 0.0148(7) 0.0019(6) 
C18 0.0442(8) 0.0600(9) 0.0609(9) -0.0062(7) 0.0046(7) -0.0028(7) 
C19 0.0502(8) 0.0504(8) 0.0504(8) -0.0128(6) 0.0077(6) -0.0030(6) 
C20 0.0566(10) 0.0509(9) 0.0989(14) 0.0001(9) 0.0193(9) 0.0055(7) 
C21 0.0606(9) 0.0529(8) 0.0358(7) -0.0013(6) 0.0099(6) 0.0092(7) 
C22 0.0546(10) 0.1121(16) 0.0819(13) -0.0276(12) 0.0188(9) 0.0001(10) 
C23 0.0495(8) 0.0473(8) 0.0367(7) 0.0003(6) 0.0066(6) 0.0044(6) 
C24 0.1256(17) 0.0440(9) 0.0666(11) 0.0065(8) 0.0038(11) 0.0034(10) 
  
_geom_special_details 
; 
 All esds (except the esd in the dihedral angle between two l.s. planes) 
 are estimated using the full covariance matrix.  The cell esds are taken 
 into account individually in the estimation of esds in distances, angles 
 and torsion angles; correlations between esds in cell parameters are only 
 used when they are defined by crystal symmetry.  An approximate (isotropic) 
 treatment of cell esds is used for estimating esds involving l.s. planes. 
; 
  
loop_ 
 _geom_bond_atom_site_label_1 
 _geom_bond_atom_site_label_2 
 _geom_bond_distance 
 _geom_bond_site_symmetry_2 
 _geom_bond_publ_flag 
O1 C8 1.3731(16) . ? 
O1 C12 1.4298(16) . ? 
O2 C21 1.3327(19) . ? 
O2 C22 1.449(2) . ? 
O3 C21 1.1971(18) . ? 
O4 C13 1.2168(15) . ? 
O5 C23 1.3348(16) . ? 
O5 C24 1.4446(18) . ? 
O6 C23 1.2048(17) . ? 
C1 C2 1.515(2) . ? 
C1 H1A 0.9600 . ? 
C1 H1B 0.9600 . ? 
C1 H1C 0.9600 . ? 
C2 C7 1.376(3) . ? 
C2 C3 1.379(3) . ? 
C3 C4 1.378(2) . ? 
C3 H3 0.9300 . ? 
C4 C5 1.393(2) . ? 
C4 H4 0.9300 . ? 
C5 C6 1.383(2) . ? 
C5 C8 1.4657(19) . ? 
C6 C7 1.384(2) . ? 
C6 H6 0.9300 . ? 
C7 H7 0.9300 . ? 
C8 C9 1.3495(19) . ? 
C9 C10 1.4422(18) . ? 
C9 H9 0.9300 . ? 
C10 C11 1.3520(18) . ? 
C10 C13 1.5071(17) . ? 
C11 C23 1.4716(18) . ? 
C11 C12 1.5037(18) . ? 
C12 C21 1.532(2) . ? 
C12 H12 0.9800 . ? 
C13 C14 1.4887(19) . ? 
C14 C19 1.3924(19) . ? 
C14 C15 1.3932(18) . ? 
C15 C16 1.380(2) . ? 
C15 H15 0.9300 . ? 
C16 C17 1.393(2) . ? 
C16 H16 0.9300 . ? 
C17 C18 1.390(2) . ? 
C17 C20 1.508(2) . ? 
C18 C19 1.384(2) . ? 
C18 H18 0.9300 . ? 
C19 H19 0.9300 . ? 
C20 H20A 0.9600 . ? 
C20 H20B 0.9600 . ? 
C20 H20C 0.9600 . ? 
C20 H20D 0.9600 . ? 
C20 H20E 0.9600 . ? 
C20 H20F 0.9600 . ? 
C22 H22A 0.9600 . ? 
C22 H22B 0.9600 . ? 
C22 H22C 0.9600 . ? 
C24 H24A 0.9600 . ? 
C24 H24B 0.9600 . ? 
C24 H24C 0.9600 . ? 
  
loop_ 
 _geom_angle_atom_site_label_1 
 _geom_angle_atom_site_label_2 
 _geom_angle_atom_site_label_3 
 _geom_angle 
 _geom_angle_site_symmetry_1 
 _geom_angle_site_symmetry_3 
 _geom_angle_publ_flag 
C8 O1 C12 114.13(10) . . ? 
C21 O2 C22 115.54(13) . . ? 
C23 O5 C24 116.36(12) . . ? 
C2 C1 H1A 109.5 . . ? 
C2 C1 H1B 109.5 . . ? 
H1A C1 H1B 109.5 . . ? 
C2 C1 H1C 109.5 . . ? 
H1A C1 H1C 109.5 . . ? 
H1B C1 H1C 109.5 . . ? 
C7 C2 C3 117.21(15) . . ? 
C7 C2 C1 121.71(17) . . ? 
C3 C2 C1 121.06(18) . . ? 
C4 C3 C2 121.55(16) . . ? 
C4 C3 H3 119.2 . . ? 
C2 C3 H3 119.2 . . ? 
C3 C4 C5 121.14(15) . . ? 
C3 C4 H4 119.4 . . ? 
C5 C4 H4 119.4 . . ? 
C6 C5 C4 117.36(14) . . ? 
C6 C5 C8 121.68(13) . . ? 
C4 C5 C8 120.96(13) . . ? 
C5 C6 C7 120.72(16) . . ? 
C5 C6 H6 119.6 . . ? 
C7 C6 H6 119.6 . . ? 
C2 C7 C6 122.01(17) . . ? 
C2 C7 H7 119.0 . . ? 
C6 C7 H7 119.0 . . ? 
C9 C8 O1 119.57(12) . . ? 
C9 C8 C5 126.99(12) . . ? 
O1 C8 C5 113.32(11) . . ? 
C8 C9 C10 120.14(12) . . ? 
C8 C9 H9 119.9 . . ? 
C10 C9 H9 119.9 . . ? 
C11 C10 C9 118.60(11) . . ? 
C11 C10 C13 125.94(11) . . ? 
C9 C10 C13 115.42(11) . . ? 
C10 C11 C23 127.34(12) . . ? 
C10 C11 C12 115.65(11) . . ? 
C23 C11 C12 116.94(11) . . ? 
O1 C12 C11 112.01(11) . . ? 
O1 C12 C21 108.59(11) . . ? 
C11 C12 C21 114.82(11) . . ? 
O1 C12 H12 107.0 . . ? 
C11 C12 H12 107.0 . . ? 
C21 C12 H12 107.0 . . ? 
O4 C13 C14 122.46(11) . . ? 
O4 C13 C10 117.95(12) . . ? 
C14 C13 C10 119.44(11) . . ? 
C19 C14 C15 118.60(12) . . ? 
C19 C14 C13 122.00(12) . . ? 
C15 C14 C13 119.40(11) . . ? 
C16 C15 C14 120.23(13) . . ? 
C16 C15 H15 119.9 . . ? 
C14 C15 H15 119.9 . . ? 
C15 C16 C17 121.60(13) . . ? 
C15 C16 H16 119.2 . . ? 
C17 C16 H16 119.2 . . ? 
C18 C17 C16 117.83(13) . . ? 
C18 C17 C20 121.42(14) . . ? 
C16 C17 C20 120.74(14) . . ? 
C19 C18 C17 121.05(14) . . ? 
C19 C18 H18 119.5 . . ? 
C17 C18 H18 119.5 . . ? 
C18 C19 C14 120.69(13) . . ? 
C18 C19 H19 119.7 . . ? 
C14 C19 H19 119.7 . . ? 
C17 C20 H20A 109.5 . . ? 
C17 C20 H20B 109.5 . . ? 
H20A C20 H20B 109.5 . . ? 
C17 C20 H20C 109.5 . . ? 
H20A C20 H20C 109.5 . . ? 
H20B C20 H20C 109.5 . . ? 
C17 C20 H20D 109.5 . . ? 
H20A C20 H20D 141.1 . . ? 
H20B C20 H20D 56.3 . . ? 
H20C C20 H20D 56.3 . . ? 
C17 C20 H20E 109.5 . . ? 
H20A C20 H20E 56.3 . . ? 
H20B C20 H20E 141.1 . . ? 
H20C C20 H20E 56.3 . . ? 
H20D C20 H20E 109.5 . . ? 
C17 C20 H20F 109.5 . . ? 
H20A C20 H20F 56.3 . . ? 
H20B C20 H20F 56.3 . . ? 
H20C C20 H20F 141.1 . . ? 
H20D C20 H20F 109.5 . . ? 
H20E C20 H20F 109.5 . . ? 
O3 C21 O2 125.14(15) . . ? 
O3 C21 C12 123.93(15) . . ? 
O2 C21 C12 110.83(12) . . ? 
O2 C22 H22A 109.5 . . ? 
O2 C22 H22B 109.5 . . ? 
H22A C22 H22B 109.5 . . ? 
O2 C22 H22C 109.5 . . ? 
H22A C22 H22C 109.5 . . ? 
H22B C22 H22C 109.5 . . ? 
O6 C23 O5 123.24(13) . . ? 
O6 C23 C11 123.58(13) . . ? 
O5 C23 C11 113.18(11) . . ? 
O5 C24 H24A 109.5 . . ? 
O5 C24 H24B 109.5 . . ? 
H24A C24 H24B 109.5 . . ? 
O5 C24 H24C 109.5 . . ? 
H24A C24 H24C 109.5 . . ? 
H24B C24 H24C 109.5 . . ? 
  
loop_ 
 _geom_torsion_atom_site_label_1 
 _geom_torsion_atom_site_label_2 
 _geom_torsion_atom_site_label_3 
 _geom_torsion_atom_site_label_4 
 _geom_torsion 
 _geom_torsion_site_symmetry_1 
 _geom_torsion_site_symmetry_2 
 _geom_torsion_site_symmetry_3 
 _geom_torsion_site_symmetry_4 
 _geom_torsion_publ_flag 
C7 C2 C3 C4 0.7(3) . . . . ? 
C1 C2 C3 C4 -177.88(18) . . . . ? 
C2 C3 C4 C5 -0.9(3) . . . . ? 
C3 C4 C5 C6 0.4(3) . . . . ? 
C3 C4 C5 C8 -179.28(16) . . . . ? 
C4 C5 C6 C7 0.1(3) . . . . ? 
C8 C5 C6 C7 179.81(17) . . . . ? 
C3 C2 C7 C6 -0.2(3) . . . . ? 
C1 C2 C7 C6 178.4(2) . . . . ? 
C5 C6 C7 C2 -0.2(3) . . . . ? 
C12 O1 C8 C9 28.45(17) . . . . ? 
C12 O1 C8 C5 -155.23(11) . . . . ? 
C6 C5 C8 C9 -171.04(15) . . . . ? 
C4 C5 C8 C9 8.6(2) . . . . ? 
C6 C5 C8 O1 13.0(2) . . . . ? 
C4 C5 C8 O1 -167.35(14) . . . . ? 
O1 C8 C9 C10 7.4(2) . . . . ? 
C5 C8 C9 C10 -168.33(13) . . . . ? 
C8 C9 C10 C11 -19.8(2) . . . . ? 
C8 C9 C10 C13 158.06(12) . . . . ? 
C9 C10 C11 C23 172.62(13) . . . . ? 
C13 C10 C11 C23 -5.0(2) . . . . ? 
C9 C10 C11 C12 -4.26(18) . . . . ? 
C13 C10 C11 C12 178.12(12) . . . . ? 
C8 O1 C12 C11 -50.56(15) . . . . ? 
C8 O1 C12 C21 77.29(13) . . . . ? 
C10 C11 C12 O1 38.35(16) . . . . ? 
C23 C11 C12 O1 -138.86(12) . . . . ? 
C10 C11 C12 C21 -86.11(15) . . . . ? 
C23 C11 C12 C21 96.68(14) . . . . ? 
C11 C10 C13 O4 -113.05(15) . . . . ? 
C9 C10 C13 O4 69.27(16) . . . . ? 
C11 C10 C13 C14 71.23(17) . . . . ? 
C9 C10 C13 C14 -106.46(13) . . . . ? 
O4 C13 C14 C19 -168.58(13) . . . . ? 
C10 C13 C14 C19 6.95(18) . . . . ? 
O4 C13 C14 C15 10.38(19) . . . . ? 
C10 C13 C14 C15 -174.10(11) . . . . ? 
C19 C14 C15 C16 -0.78(19) . . . . ? 
C13 C14 C15 C16 -179.77(12) . . . . ? 
C14 C15 C16 C17 0.0(2) . . . . ? 
C15 C16 C17 C18 0.7(2) . . . . ? 
C15 C16 C17 C20 179.75(14) . . . . ? 
C16 C17 C18 C19 -0.8(2) . . . . ? 
C20 C17 C18 C19 -179.76(15) . . . . ? 
C17 C18 C19 C14 0.0(2) . . . . ? 
C15 C14 C19 C18 0.8(2) . . . . ? 
C13 C14 C19 C18 179.72(13) . . . . ? 
C22 O2 C21 O3 7.5(2) . . . . ? 
C22 O2 C21 C12 -169.11(13) . . . . ? 
O1 C12 C21 O3 20.49(18) . . . . ? 
C11 C12 C21 O3 146.74(14) . . . . ? 
O1 C12 C21 O2 -162.86(10) . . . . ? 
C11 C12 C21 O2 -36.61(15) . . . . ? 
C24 O5 C23 O6 5.7(2) . . . . ? 
C24 O5 C23 C11 -174.43(14) . . . . ? 
C10 C11 C23 O6 -159.39(15) . . . . ? 
C12 C11 C23 O6 17.5(2) . . . . ? 
C10 C11 C23 O5 20.7(2) . . . . ? 
C12 C11 C23 O5 -162.43(12) . . . . ? 
  
_diffrn_measured_fraction_theta_max    0.994 
_diffrn_reflns_theta_full              25.50 
_diffrn_measured_fraction_theta_full   0.994 
_refine_diff_density_max    0.171 
_refine_diff_density_min   -0.146 
_refine_diff_density_rms    0.030 
  
